# Supplementary material for: Spatial characterization of interface dermatitis in cutaneous lupus reveals novel chemokine ligand-receptor pairs that drive disease
Source: PubMed Central journal article supplement — bioRxiv. 2025 May 22:2024.01.05.574422. Originally published 2024 Jan 6. Preprint. [Version 2] doi: 10.1101/2024.01.05.574422 (PMC10802382; doi:10.1101/2024.01.05.574422), 2025-05-22
Supplement: media-1.pdf [file media-1.pdf]

**Supplement to:** Spatial characterization of interface dermatitis in cutaneous lupus reveals novel chemokine ligand-receptor pairs that drive disease

**Authors:** Saeed Shakiba<sup>1\*</sup>, Nazgol-Sadat Haddadi<sup>1\*</sup>, Khashayar Afshari<sup>1</sup>, Janet E. Lubov<sup>1</sup>, Haya S. Raef<sup>1</sup>, Robert Li<sup>1</sup>, Ümmügülsüm Yildiz-Altay<sup>1</sup>, Mridushi Daga<sup>1</sup>, Maggi Ahmed Refat<sup>1</sup>, Evangeline Kim<sup>1</sup>, Johanna Galindo DeLaflin<sup>1</sup>, Andressa Akabane<sup>1</sup>, Shany Sherman-Bergman<sup>1</sup>, Elizabeth MacDonald<sup>1</sup>, James P. Strassner<sup>1</sup>, Liang Zhang<sup>2</sup>, Michael Leon<sup>2</sup>, Thomas Cicuto<sup>3</sup>, Christina Baer<sup>3</sup>, Karen Dresser<sup>4</sup>, Yan Liang<sup>2</sup>, James B Whitley<sup>5</sup>, Sladjana Skopelja-Gardner<sup>5</sup>, John E Harris<sup>1</sup>, April Deng<sup>4</sup>, Matthew D. Vesely<sup>6</sup>, Mehdi Rashighi<sup>1</sup> & Jillian Richmond<sup>1\*\*</sup>

**Affiliations:**

<sup>1</sup>UMass Chan Medical School, Dept of Dermatology, Worcester, MA, USA

<sup>2</sup>NanoString Technologies, Seattle, WA, USA

<sup>3</sup>UMass Chan Medical School, SCOPE Core, Worcester, MA USA

<sup>4</sup>UMass Chan Medical School, Dept of Pathology, Worcester, MA, USA

<sup>5</sup>Yale University School of Medicine, Dept of Dermatology, New Haven, CT, USA

<sup>6</sup>Dartmouth Hitchcock Medical Center, Dept of Medicine, Lebanon, NH, USA

\*Co-first authors

\*\*Correspondence - for blister biopsies and patient info [mehdi.rashighi@umassmed.edu](mailto:mehdi.rashighi@umassmed.edu), for all other inquiries

[jillian.richmond@umassmed.edu](mailto:jillian.richmond@umassmed.edu)

**List of Supplementary Materials:**

Fig S1. Quality Control for Digital Spatial Profiling (DSP) Whole Transcriptome Atlas (WTA) spatial transcriptomics.

Fig S2. Quality Control and Pathway Analysis for Regions of Interest (ROIs).

Fig S3. Validation of DSP dataset using historical microarray dataset and a cancer transcriptome atlas (CTA) dataset.

Fig S4. Validation of DLE dataset ROIs as compared to CTA.

Fig S5. Examining CD45+ and epidermal ROIs in DLE vs SCLE reveals pathways and DEGs unique to each CLE subtype.

Fig S6. Stability of chemokines in lesional and nonlesional samples over time.

Fig S7. Additional donors for chemotaxis exhibit similar migratory patterns.

Fig S8. Flow gating strategy for assessing myeloid populations.

Fig S9. Examination of CD14+CD16+ cells in blister biopsies

Fig S10. CCR5 is not enriched on CD14 vs CD16 expressing myeloid cells.

Table S1. Blister biopsy and blood donation patient info & characterization (UMass Chan).

Table S2. Archival CLE biopsies used in WTA Digital Spatial Profiling (UMass Chan).

Table S3. Validation archival CLE biopsies used in CTA Digital Spatial Profiling (Yale).

Table S4. Olink DEPs calculated by NPX software and 2-way ANOVA.

Table S5. Chemotaxis and chemokine receptor staining blood donor information (UMass Chan and Dartmouth Hitchcock).

Table S6. Antibody information & RRIDs.

Table S7. Chemokine information.

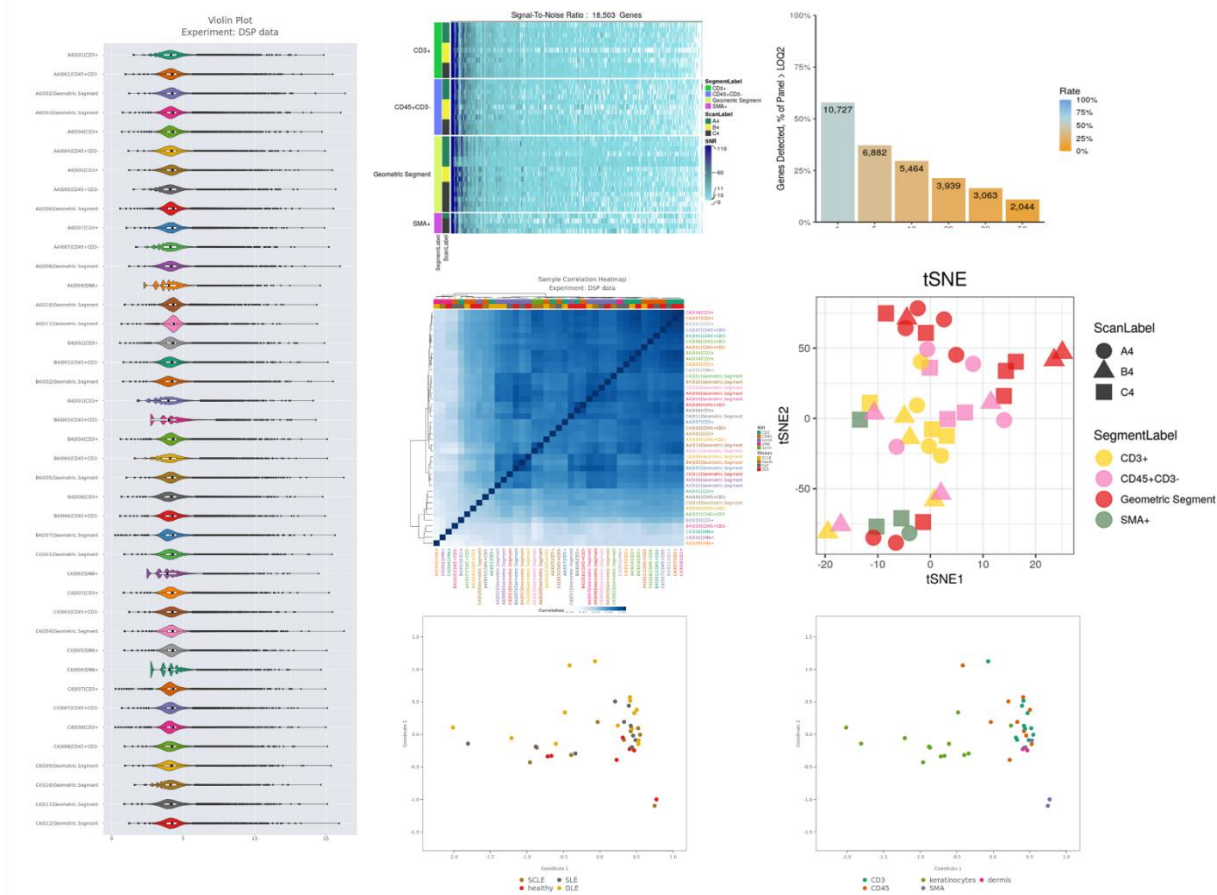

**Fig. S1. Quality Control for Digital Spatial Profiling (DSP) Whole Transcriptome Atlas (WTA) spatial transcriptomics.** (A). Violin Plot showing sample distribution. (B). Signal-to-noise heatmap grouped by ROI type and slide. (C). Histogram Chart for LOQ2 Values, presents a histogram chart that conveys the distribution of LOQ2 values. These values were employed to filter genes that are expressed near background levels, aiding in data quality assessment. (D). Sample Correlation Heatmap showed correlation heatmap is presented, depicting the pairwise correlation between samples within the DSP - RNA dataset. Notably, this heatmap highlights specific regions of interest (ROIs) in proximity to the respective antibodies used for staining. (E). t-distributed Stochastic Neighbor Embedding (t-SNE) Graph visualizes the data points with scan labels and segment labels, effectively illustrating the spatial distribution of data and the relationship between segments. (F). Principal Component Analysis (PCA) for the clustering of samples based on disease type (left) and cell types (right).



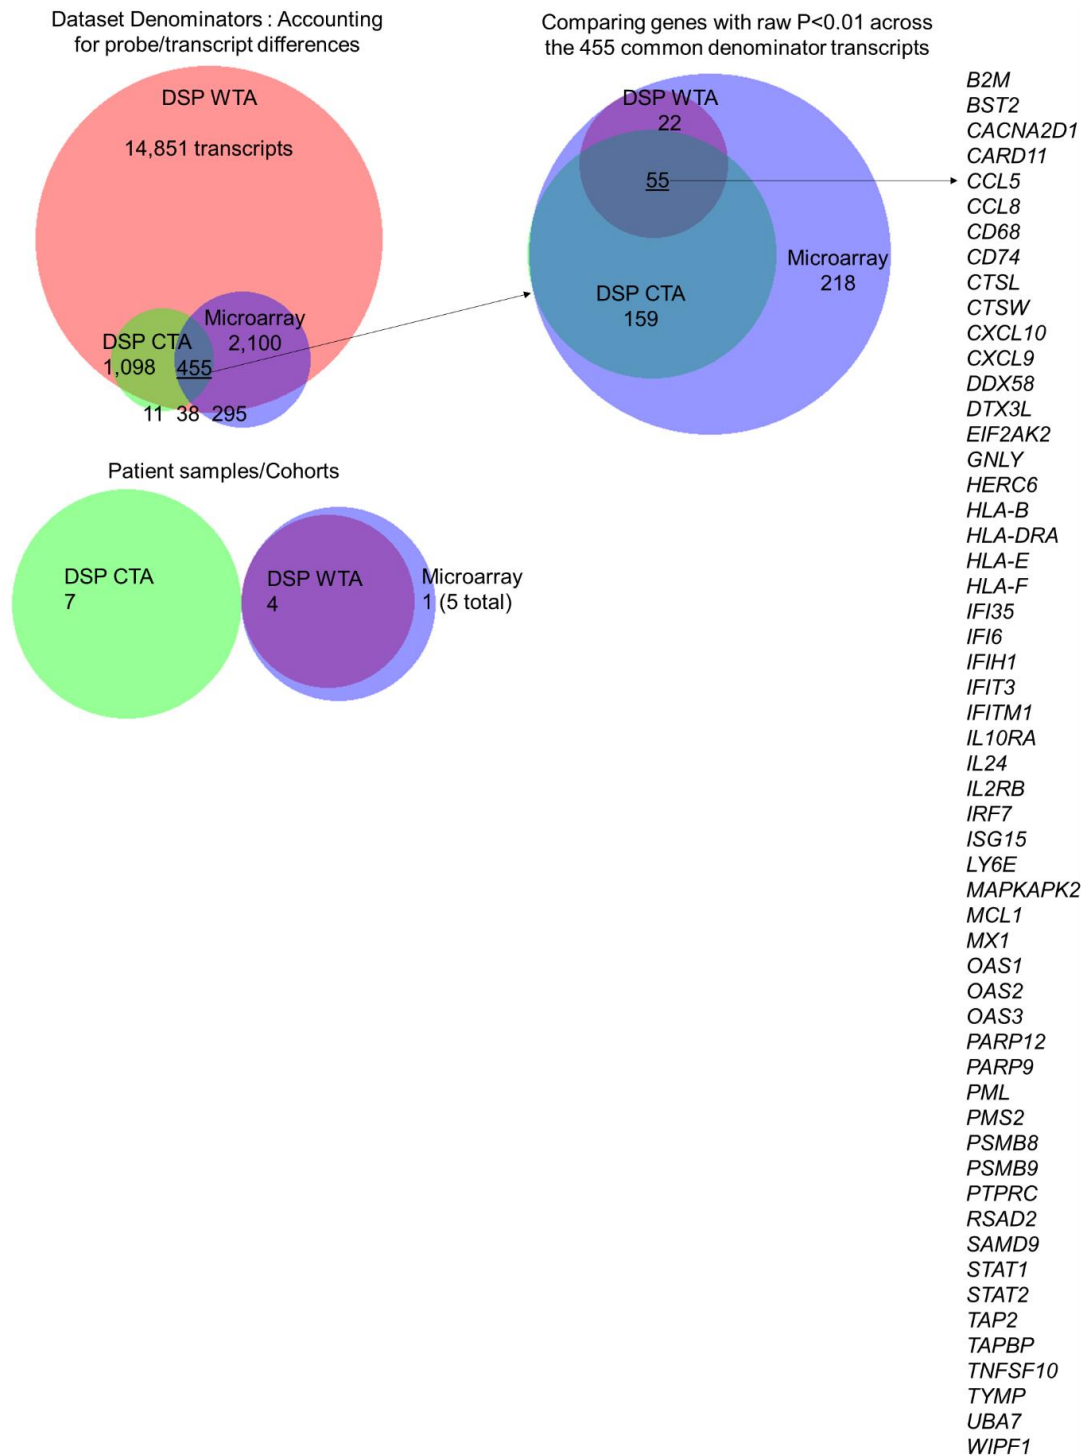

**Fig S3. Validation of DSP dataset using historical microarray dataset and a cancer transcriptome atlas (CTA) dataset.** We compared DEGs in DSP WTA (this dataset), DSP CTA (Vesely dataset) and microarray (Ko/Harris dataset). Among these datasets, 455 common probe/transcript denominators were identified. This figure focuses on the 55 genes present across all datasets with raw p-values < 0.01. This comparative analysis offers a robust assessment of the consistency and reliability of the DSP WTA dataset by examining the shared DEGs across multiple datasets. The presence of these 55 genes underscores their significance in the context of cutaneous lupus.



found 18 DEGs that are expressed by both the stroma and the immune cells (purple vs teal BioVenn). We also examined receptor:ligand pairs across these ROI types to understand how the immune system communicates with keratinocytes in CLE using cellPhoneDB, which demonstrated multiple predicted interactions.

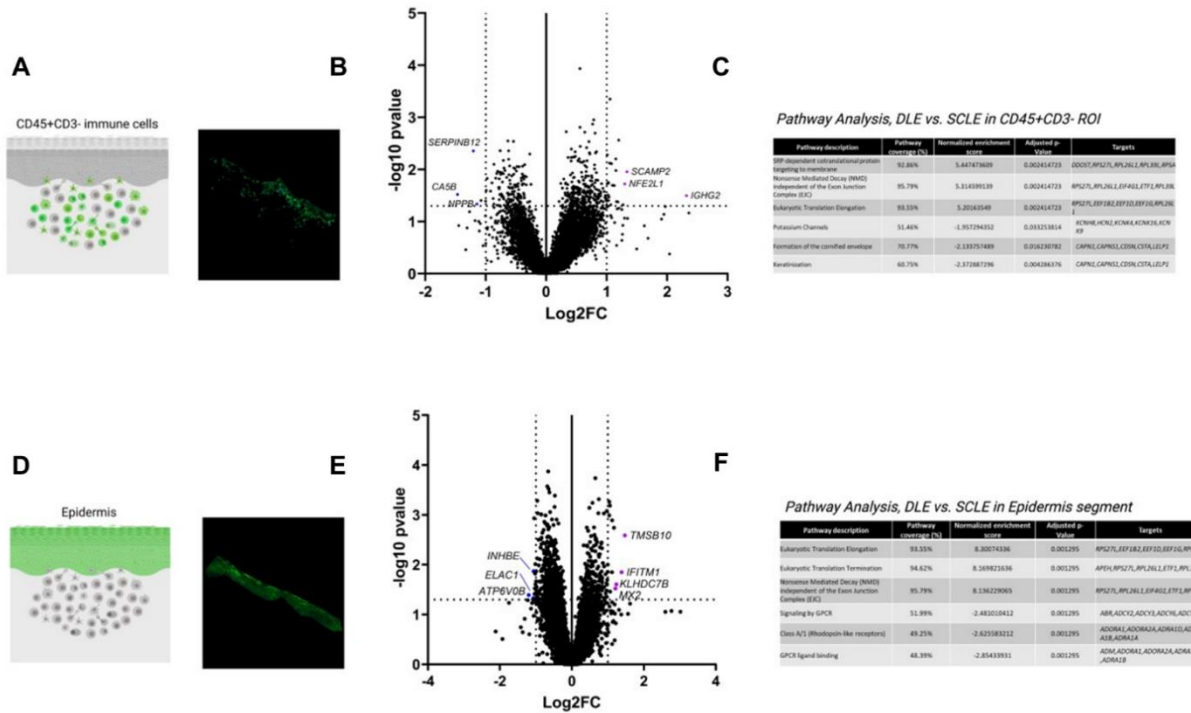

**Fig S5. Examining CD45+ and epidermal ROIs in DLE vs SCLE reveals pathways and DEGs unique to each CLE subtype.** We examined differential gene expression, pathway analysis, and the unique genes associated with Cutaneous Lupus Erythematosus (CLE) subtypes - Discoid Lupus Erythematosus (DLE) and Subacute Cutaneous Lupus Erythematosus (SCLE). (A) Schematic of immune cell ROIs (CD45+CD3-) and example image. (B) Volcano Plot of Differential Gene Expression (DLE vs. SCLE) showed highlights genes that are uniquely expressed or differentially regulated in each subtype. (C) Pathway Analysis of the CD45+CD3- ROIs in in both DLE and SCLE. (D) Schematic of geometric ROIs for epidermis and example image. (E) Volcano Plot of Differential Gene Expression (DLE vs. SCLE) highlights genes that are uniquely expressed or differentially regulated in keratinocytes/epidermis in each subtype. (F) Pathway Analysis of the epidermal ROIs in in both DLE and SCLE with pathways associated with immune cells in these clinical subtypes.

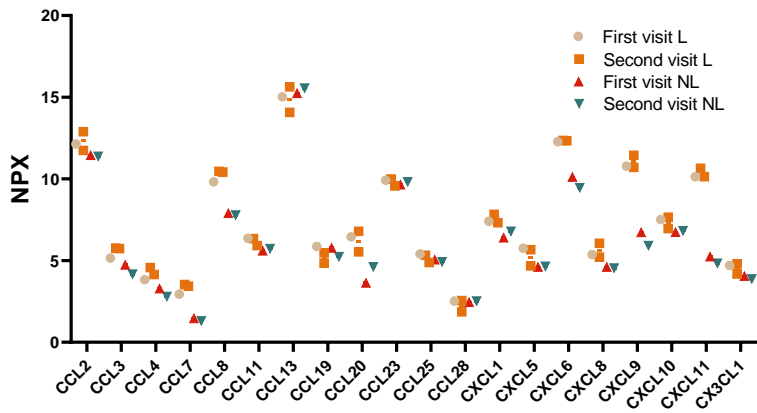

**Fig S6. Stability of chemokines in lesional and nonlesional samples over time.** We compared data obtained during the first and second visits from a repeat donor who was sampled approximately 6 months apart. The quantification of chemokines is based on Normalized Protein eXpression (NPX) values from Olink targeted proteomics.

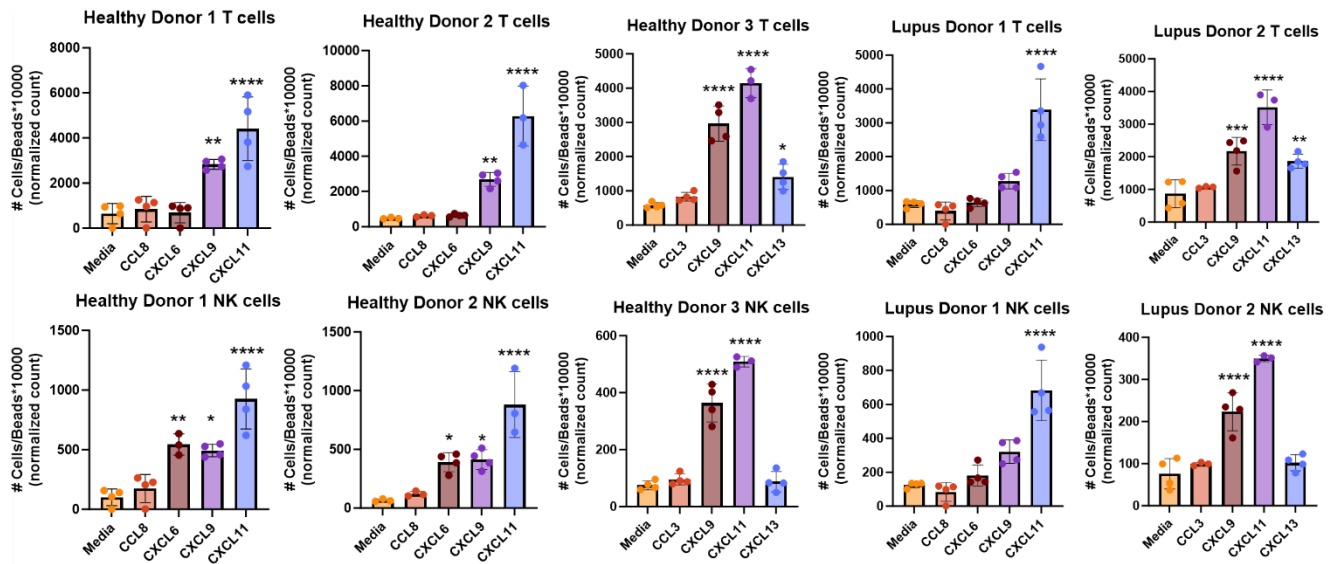

**Fig S7. Additional donors for chemotaxis exhibit similar migratory patterns.** We tested n=3 healthy and n=2 lupus donor PBMCs in triplicate or quadruplicate in chemotaxis assays. Top row depicts T cell migration, bottom row depicts NK cell migration. (\*p < 0.05, \*\*p < 0.01, \*\*\*\*p < 0.0001 for one-way ANOVAs with Dunnet's post hoc tests compared to media control wells).



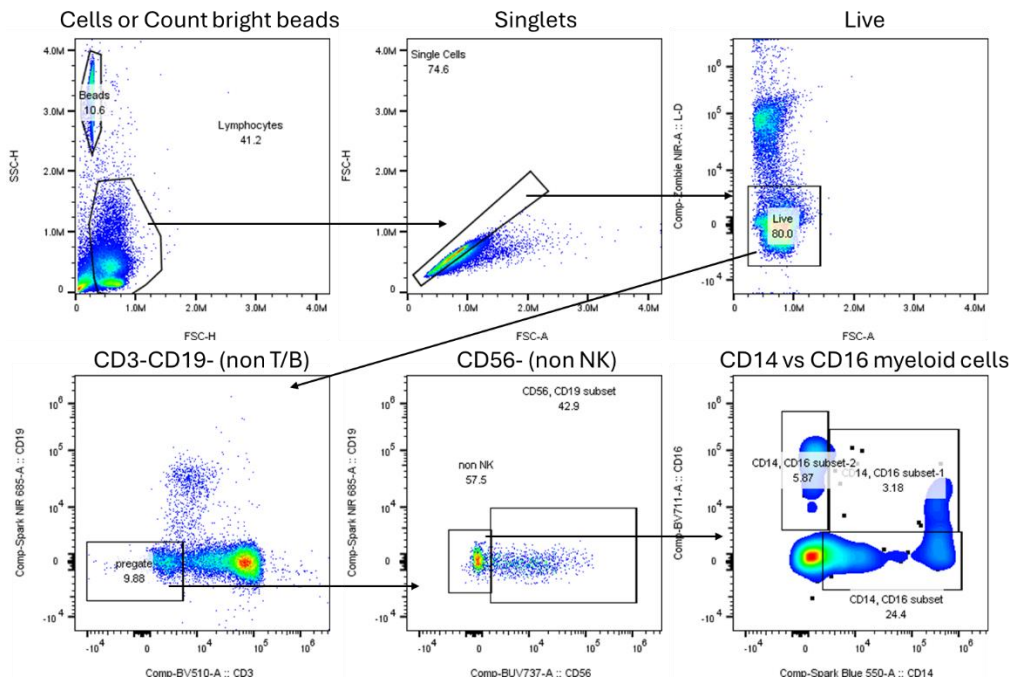

**Fig S8. Flow gating strategy for assessing myeloid populations.** Example flow gating strategy employed to assess CD14 vs CD16 myeloid cells using cells->singlets->live->CD3-CD19- and CD56- pregates, followed by CD14 vs CD16. This example is from PBMCs.

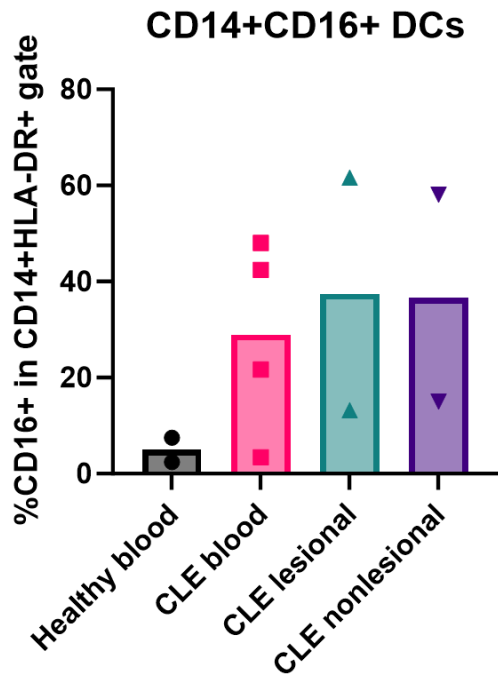

**Fig S9. Examination of CD14+CD16+ cells in blister biopsies.** Confirmation of CD16+ antigen presenting cell populations as described in Kahlenberg 10X spatial dataset. Note that not every blister and blood donor had significant cell populations as detected by flow cytometry.

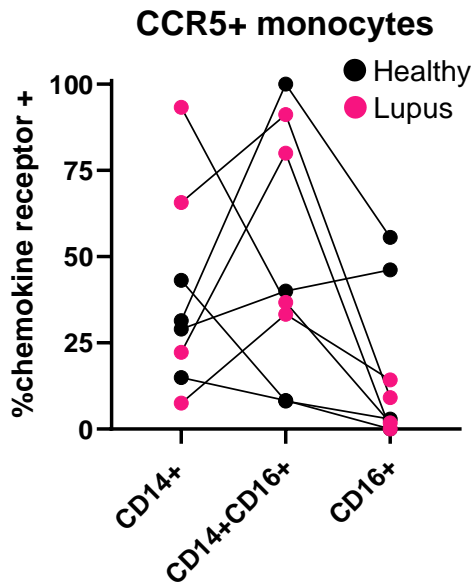

**Fig S10. CCR5 is not enriched on CD14 vs CD16 expressing myeloid cells.** CCR5 is an alternate receptor for CCL8 on monocytes. We noted no specific trend in expression in different quadrants for CD14 vs CD16 expressing myeloid cells, which could not account for chemotactic differences observed in response to CCL8.

**Table S1. Blister biopsy and blood donation patient info & characterization (UMass Chan).**

| Subject # | Diagnosis     | Age | Sex | Race/Ethnicity         | Treatment status                                                                                                                                                                                                | Pertinent medical history      | Blister biopsy | Blister site L | Blister site NL       | Blood sample |
|-----------|---------------|-----|-----|------------------------|-----------------------------------------------------------------------------------------------------------------------------------------------------------------------------------------------------------------|--------------------------------|----------------|----------------|-----------------------|--------------|
| 1         | SCLE          | 45  | M   | White                  | Hydroxychloroquine (Plaquenil), last used 2 years prior to the biopsy; triamcinolone 0.1% ointment BID, PRN 1 year prior; Steroids Creams Last applied few months prior to the biopsy                           | none                           | Y              | upper back     | forearm, inner aspect | Y            |
| 2         | Active SLE    | 44  | F   | White, Hispanic Latina | On Lyrica                                                                                                                                                                                                       | none                           | Y              | cheek          | forearm               | Y            |
| 3         | SCLE          | 75  | F   | White                  | On Plaquenil. Prescribed just prior to biopsy: Protopic 0.1% ointment BID PRN itching or rash on the face; triamcinolone 0.1% cream BID PRN itching or rash on the trunk and limbs; fluocinonide scalp solution | Raynaud's                      | Y              | outer arm      | forearm, inner aspect | Y            |
| 4         | SCLE with SLE | 55  | F   | White                  | On hydroxychloroquine                                                                                                                                                                                           | Fibromyalgia, photosensitivity | Y              | arm            | arm                   | Y            |
| 5         | Healthy       | 34  | F   | White                  | none                                                                                                                                                                                                            | none                           | N              | N/A            | N/A                   | Y            |
| 6         | Healthy       | 54  | F   | Asian                  | none                                                                                                                                                                                                            | none                           | N              | N/A            | N/A                   | Y            |
| 7         | Healthy       | 28  | M   | White, Middle Eastern  | none                                                                                                                                                                                                            | none                           | Y              | N/A            | arm                   | N            |
| 8         | Healthy       | 60  | F   | White                  | none                                                                                                                                                                                                            | none                           | Y              | N/A            | arm                   | N            |
| 9         | Healthy       | 52  | F   | White                  | none                                                                                                                                                                                                            | none                           | Y              | N/A            | arm                   | Y            |

SCLE = subacute cutaneous lupus erythematosus; SLE = systemic lupus erythematosus; BID = twice daily; PRN = taken as needed; FH = family history; L = lesional; NL = nonlesional; N/A = not applicable, ND = not determined, Y = yes, N = no

**Table S2. Archival CLE biopsies used in WTA Digital Spatial Profiling (UMass Chan).**

| Disease status      | Systemic symptoms                                            | Age (yr) | Sex | Ethnicity                  | Age at diagnosis (yr) | Age at skin biopsy (yr) | Site of Bx                        | Positive antibodies                                         | CLE-related medications at the time of Bx                       |
|---------------------|--------------------------------------------------------------|----------|-----|----------------------------|-----------------------|-------------------------|-----------------------------------|-------------------------------------------------------------|-----------------------------------------------------------------|
| SCLE                | Bilateral chronic hand pain                                  | 68       | M   | White, not Hispanic Latino | 68                    | 68                      | Shoulder+ Forearm                 | +ANA (speckled), +SSA, +dsDNA                               | None                                                            |
| DLE                 | Swollen salivary glands                                      | 42       | M   | White, not Hispanic Latino | ?                     | 42                      | Face                              | +Anti-SM/RNP, +ANA                                          | HCTZ (new forearm rash). Cheek rash predated HCTZ               |
| SCLE (drug induced) | None                                                         | 76       | F   | White, not Hispanic Latino | 76                    | 76                      | Shoulder                          | +ANA (speckled), +SSA, +SSB; Later diagnosed with Sjogren's | HCTZ, glipizide, omeprazole                                     |
| SCLE                | None (until 04/2020, joint pain and blue toes)               | 37       | M   | White, not Hispanic Latino | 37                    | 37                      | Abdomen                           | +ANA, +SSA, +SSB                                            | Oral ketoconazole (previous hx of tinea versicolor)             |
| DLE                 | None                                                         | 68       | F   | White, not Hispanic Latino | 68                    | 68                      | Scalp                             | +ANA (speckled and homogeneous), +SSA, +Sm/RNP              | Topical clobetasol, T-Gel shampoo (initially thought psoriasis) |
| DLE                 | None                                                         | 45       | F   | White, not Hispanic Latino | 45                    | ?                       | Neck (Posterior auricular region) | Borderline +ANA                                             | ?                                                               |
| DLE                 | vague arthralgia, no other features to meet criteria for SLE | 51       | F   | White, not Hispanic Latino | 51                    | 51                      | Forehead                          | +ANA, +dsDNA                                                | None                                                            |
| Healthy             | N/A                                                          | 64       | F   | White, not Hispanic Latino | N/A                   | N/A                     | Forehead                          | N/A                                                         | None                                                            |
| Healthy             | N/A                                                          | 32       | M   | White, not Hispanic Latino | N/A                   | N/A                     | Forehead                          | N/A                                                         | None                                                            |
| Healthy             | N/A                                                          | 41       | M   | White, not Hispanic Latino | N/A                   | N/A                     | Forearm                           | N/A                                                         | None                                                            |

**Table S3. Validation archival CLE biopsies used in CTA Digital Spatial Profiling (Yale).**

| <b>Sample Name</b>      | <b>Sex</b> | <b>Age (years)</b> | <b>Location</b> | <b>Treatment at time of biopsy</b> | <b>ROIs</b> |
|-------------------------|------------|--------------------|-----------------|------------------------------------|-------------|
| <i><b>CTA panel</b></i> |            |                    |                 |                                    |             |
| DLE #1                  | F          | 45                 | Cheek           | None                               | 1-4         |
| DLE #2                  | M          | 53                 | Nose            | None                               | 5-8         |
| DLE #3                  | F          | 40                 | Cheek           | None                               | 9-12        |
|                         |            |                    |                 |                                    |             |
|                         |            |                    |                 |                                    |             |
| Control #1              | F          | 28                 | Neck            | -                                  | 1-4         |
| Control #2              | M          | 52                 | Back            | -                                  | 5-8         |
| Control #3              | M          | 33                 | Back            | -                                  | 9-12        |

**Table S4. Olink DEPs calculated by NPX software and 2-way ANOVA.**Significant for CLE lesional versus nonlesional and healthy

## CXCL11

|                                  |       |                 |     |    |        |
|----------------------------------|-------|-----------------|-----|----|--------|
| CLE Lesional vs. CLE Nonlesional | 2.878 | 0.2467 to 5.508 | Yes | *  | 0.0351 |
| CLE Lesional vs. Healthy         | 5.395 | 1.531 to 9.259  | Yes | *  | 0.0127 |
| CLE Nonlesional vs. Healthy      | 2.518 | -2.698 to 7.733 | No  | ns | 0.1869 |

## CXCL9

|                                  |       |                 |     |    |        |
|----------------------------------|-------|-----------------|-----|----|--------|
| CLE Lesional vs. CLE Nonlesional | 2.74  | 1.189 to 4.291  | Yes | ** | 0.0023 |
| CLE Lesional vs. Healthy         | 5.385 | 0.2335 to 10.54 | Yes | *  | 0.0456 |
| CLE Nonlesional vs. Healthy      | 2.644 | -1.693 to 6.981 | No  | ns | 0.167  |

## CXCL6

|                                  |       |                 |     |    |        |
|----------------------------------|-------|-----------------|-----|----|--------|
| CLE Lesional vs. CLE Nonlesional | 1.97  | 0.2310 to 3.710 | Yes | *  | 0.0275 |
|                                  |       | 0.08853 to      |     |    |        |
| CLE Lesional vs. Healthy         | 5.917 | 11.75           | Yes | *  | 0.0482 |
| CLE Nonlesional vs. Healthy      | 3.947 | -2.539 to 10.43 | No  | ns | 0.137  |

## IFN-gamma

|                                  |       |                  |     |    |        |
|----------------------------------|-------|------------------|-----|----|--------|
| CLE Lesional vs. CLE Nonlesional | 2.358 | 0.2003 to 4.516  | Yes | *  | 0.0331 |
| CLE Lesional vs. Healthy         | 4.2   | 1.447 to 6.953   | Yes | ** | 0.0075 |
| CLE Nonlesional vs. Healthy      | 1.842 | -0.8639 to 4.548 | No  | ns | 0.1426 |

## CASP-8

|                                  |       |                 |     |    |        |
|----------------------------------|-------|-----------------|-----|----|--------|
| CLE Lesional vs. CLE Nonlesional | 1.746 | 0.1036 to 3.389 | Yes | *  | 0.0374 |
| CLE Lesional vs. Healthy         | 3.206 | 0.6071 to 5.804 | Yes | *  | 0.0235 |
| CLE Nonlesional vs. Healthy      | 1.459 | -1.249 to 4.168 | No  | ns | 0.2286 |

## CTF1

|                                  |        |                 |     |    |        |
|----------------------------------|--------|-----------------|-----|----|--------|
|                                  |        | 0.08803 to      |     |    |        |
| CLE Lesional vs. CLE Nonlesional | 0.7969 | 1.506           | Yes | *  | 0.0287 |
| CLE Lesional vs. Healthy         | 1.008  | 0.2062 to 1.810 | Yes | *  | 0.0177 |
|                                  |        | -0.4943 to      |     |    |        |
| CLE Nonlesional vs. Healthy      | 0.2112 | 0.9167          | No  | ns | 0.6099 |

Significant for CLE lesional or nonlesional versus healthy

## HGF

|                                  |       |                  |     |     |        |
|----------------------------------|-------|------------------|-----|-----|--------|
| CLE Lesional vs. CLE Nonlesional | 1.419 | -0.3617 to 3.200 | No  | ns  | 0.1258 |
| CLE Lesional vs. Healthy         | 4.07  | 2.410 to 5.730   | Yes | *** | 0.0004 |
| CLE Nonlesional vs. Healthy      | 2.651 | 0.8788 to 4.423  | Yes | **  | 0.007  |

## Flt3L

|                                  |          |                   |     |    |        |
|----------------------------------|----------|-------------------|-----|----|--------|
| CLE Lesional vs. CLE Nonlesional | 0.005873 | -0.7783 to 0.7900 | No  | ns | 0.9998 |
| CLE Lesional vs. Healthy         | 2.871    | 0.6221 to 5.121   | Yes | *  | 0.0265 |
| CLE Nonlesional vs. Healthy      | 2.865    | 0.5416 to 5.189   | Yes | *  | 0.0299 |

## CCL28

|                                  |         |                     |     |    |        |
|----------------------------------|---------|---------------------|-----|----|--------|
| CLE Lesional vs. CLE Nonlesional | 0.1427  | -0.3112 to 0.5966   | No  | ns | 0.687  |
| CLE Lesional vs. Healthy         | 0.5747  | 0.1965 to 0.9529    | Yes | ** | 0.0063 |
| CLE Nonlesional vs. Healthy      | 0.432   | 0.04441 to 0.8196   | Yes | *  | 0.0311 |
| <b>CCL25</b>                     |         |                     |     |    |        |
| CLE Lesional vs. CLE Nonlesional | -0.1353 | -1.333 to 1.062     | No  | ns | 0.951  |
| CLE Lesional vs. Healthy         | 2.122   | 0.3620 to 3.881     | Yes | *  | 0.027  |
| CLE Nonlesional vs. Healthy      | 2.257   | 0.5139 to 4.000     | Yes | *  | 0.0192 |
| <b>IFNL1</b>                     |         |                     |     |    |        |
| CLE Lesional vs. CLE Nonlesional | 1.479   | -0.5759 to 3.534    | No  | ns | 0.1587 |
| CLE Lesional vs. Healthy         | 2.646   | 0.5894 to 4.703     | Yes | *  | 0.0164 |
| CLE Nonlesional vs. Healthy      | 1.167   | 0.2188 to 2.116     | Yes | *  | 0.0203 |
| <b>CEACAM3</b>                   |         |                     |     |    |        |
| CLE Lesional vs. CLE Nonlesional | 0.1451  | -0.02555 to 0.3157  | No  | ns | 0.096  |
| CLE Lesional vs. Healthy         | -0.296  | -0.5794 to -0.01256 | Yes | *  | 0.043  |
| CLE Nonlesional vs. Healthy      | -0.4411 | -0.7595 to -0.1226  | Yes | *  | 0.0218 |

**Table S5. Chemotaxis and chemokine receptor staining blood donor information (UMass Chan and Dartmouth Hitchcock).**

| Subject | Gender | Age    | race           | Skin color | Diagnosis                                    | Treatment                                                                                                     | Chemotaxis ligands            | Chemokine Receptor staining                        |
|---------|--------|--------|----------------|------------|----------------------------------------------|---------------------------------------------------------------------------------------------------------------|-------------------------------|----------------------------------------------------|
| A       | Female | 32 y/o | Hispanic       | white      | SLE                                          | Plaquenil 300mg daily                                                                                         | N/A                           | CCR1, CXCR3, CCR5, CCR7, CXCR1, CXCR5, CXCR2, CCR2 |
| B       | Female | 64 y/o | Hispanic       | white      | DLE/SCLE                                     | 6 (15mg) pills MTX/week for past 8 mo, synthroid, albuterol                                                   | CXCL9, 11,13, CCL3            | CCR1, CXCR3, CCR5, CCR7, CXCR1, CXCR5, CXCR2, CCR2 |
| C       | Male   | 42 y/o | Hispanic       | White      | DLE with SLE                                 | Benlysta 200mg Qweekly, methotrexate 25mg Qweekly, plaquenil 200mg, Kenalog, folic acid 1mg QD, betamethasone | CXCL9, 11, 13, 6, CCL3, 25, 8 | CCR1, CXCR3, CCR5, CCR7, CXCR1, CXCR5, CCR9, CCR2  |
| D       | Female | 43 y/o | White          | White      | CLE/Sjorgens                                 | Plaquenil                                                                                                     | N/A                           | CCR1, CXCR3, CCR5, CCR7, CXCR1, CXCR5, CXCR2, CCR2 |
| E       | Female | 48 y/o | White          | White      | CLE with SLE, also has non scarring alopecia | Triamcinolone 0.1% PRN, protopic 0.1% PRN, hydroxychloroquine 300mg QD                                        | N/A                           | CCR1, CXCR3, CCR5, CCR7, CXCR1, CXCR5, CCR9, CCR2  |
| F       | Female | 35 y/o | Middle eastern | White      | Healthy                                      |                                                                                                               | N/A                           | CCR1, CXCR3, CCR5, CCR7, CXCR1, CXCR5, CXCR2, CCR2 |
| G       | Female | 34 y/o | Middle eastern | White      | Healthy                                      |                                                                                                               | CXCL9, 11,13, CCL3            | CCR1, CXCR3, CCR5, CCR7, CXCR1, CXCR5, CXCR2, CCR2 |
| H       | Female | 36 y/o | Hispanic       | White      | Healthy                                      |                                                                                                               | CXCL9, 11, 13, 6, CCL3, 25, 8 | CCR1, CXCR3, CCR5, CCR7, CXCR1, CXCR5, CCR9, CCR2  |
| I       | Male   | 28 y/o | Middle eastern | White      | Healthy; Hypothyroidism                      | Levothyroxine                                                                                                 | CXCL9, 11, 6, CCL3, 8         | CCR1, CXCR3, CCR5, CCR7, CXCR1, CXCR5, CCR9, CCR2  |
| J       | Female | 28 y/o | Middle eastern | White      | Healthy                                      |                                                                                                               | CXCL9, 11, 13, 6, CCL3, 25, 8 | CCR1, CXCR3, CCR5, CCR7, CXCR1, CXCR5, CCR9, CCR2  |
| K       | Male   | 26 y/o | Asian          | White      | Healthy                                      |                                                                                                               | CXCL6 dose curve              | CCR1, CXCR3, CCR5, CCR7, CXCR1, CXCR5, CCR9, CCR2  |

DLE = discoid lupus erythematosus; SCLE = subacute cutaneous lupus erythematosus; SLE = systemic lupus erythematosus; N/A = not applicable



**Table S6. Antibody information & RRIDs.**

| <b>Marker</b>              | <b>Company</b>    | <b>Catalog No.</b> | <b>Lot No.</b> | <b>Dose</b> | <b>RRID</b>      |
|----------------------------|-------------------|--------------------|----------------|-------------|------------------|
| CD3 (BV510)                | Biolegend         | 344828             | B370758        | 5ul/test    | RRID:AB_2563704  |
| CD8 (BV605)                | Biolegend         | 344742             | B370756        | 5ul/test    | RRID:AB_2566513  |
| CD4 (Alexa Flour 700)      | Biolegend         | 344622             | B365788        | 5ul/test    | RRID:AB_2563150  |
| CD14 (Spark Blue 550)      | Biolegend         | 367148             | B361330        | 5ul/test    | RRID:AB_2832724  |
| CD56 (BUV737)              | BD<br>Biosciences | 612766             | 2332923        | 5ul/test    | RRID:AB_2813880  |
| CD19 (Spark Nir 685)       | Biolegend         | 302270             | B358744        | 5ul/test    | RRID:AB_2832581  |
| CD16 (BV711)               | Biolegend         | 360732             | B397395        | 5ul/test    | RRID:AB_2800992  |
| HLA-DR (PE)                | Biolegend         | 307606             | B373145        | 5ul/test    | RRID:AB_314684   |
| CCR1 (PerCP/Cyanine 5.5)   | Biolegend         | 362912             | B323489        | 5ul/test    | RRID:AB_2728353  |
| CXCR3 (PECy7)              | Biolegend         | 353720             | B322685        | 5ul/test    | RRID:AB_11219383 |
| CCR5 (BUV563)              | BD<br>Biosciences | 741401             | 3198452        | 5ul/test    | RRID:AB_2870893  |
| CCR7 (PE/Fire 640)         | Biolegend         | 353262             | B351674        | 5ul/test    | RRID:AB_2876669  |
| CXCR1 (APC)                | Biolegend         | 320612             | B397637        | 5ul/test    | RRID:AB_2126475  |
| CXCR5 (BV421)              | Biolegend         | 356920             | B381006        | 5ul/test    | RRID:AB_2562303  |
| CXCR2 (PE/Dazzle 594)      | Biolegend         | 320722             | B381595        | 5ul/test    | RRID:AB_2750215  |
| CCR2 (BV785)               | Biolegend         | 357234             | B366953        | 5ul/test    | RRID:AB_2800972  |
| CCR9 (PE/Dazzle 594)       | Biolegend         | 358918             | B384511        | 5ul/test    | RRID:AB_2715935  |
| Live/Dead (Zombie NIR Dye) | Biolegend         | 77184              | B369131        | 5ul/test    | N/A              |

**Table S7. Chemokine information.**

| <b>Reagent</b> | <b>Company</b> | <b>Catalog #</b> | <b>Lot #</b> | <b>Dose (s) tested in chemotaxis assay</b> |
|----------------|----------------|------------------|--------------|--------------------------------------------|
| CCL3           | Biolegend      | 759504           | B364645      | 10, 50ng/mL                                |
| CCL19          | Biolegend      | 582104           | B361963      | 30 ng/ml                                   |
| CCL23          | Biolegend      | 587002           | B389072      | 10 ng/ml                                   |
| CCL25          | Biolegend      | 586804           | B272484      | 200 ng/ml                                  |
| CXCL6          | R&D Systems    | 333-GC-025/CF    | AMM0222041   | 5, 50, 100, 200, 500 ng/ml                 |
| CXCL9          | Biolegend      | 578104           | B366484      | 100 ng/ml                                  |
| CXCL11         | Biolegend      | 574904           | B312963      | 200ng/mL                                   |
| CXCL13         | Biolegend      | 574704           | B255322      | 500 ng/ml                                  |
| CX3CL1         | R&D Systems    | 365-FR-025/CF    | AF50521041   | 100 ng/ml                                  |
| CCL2           | Biolegend      | 571404           | B365559      | 50 ng/ml                                   |
| CCL8           | Biolegend      | 581604           | B370430      | 50, 100 ng/ml                              |
